# Supplementary material for: On the traces of lost identities: chronological, anthropological and taphonomic analyses of the Late Neolithic/Early Eneolithic fragmented and commingled human remains from the Farneto rock shelter (Bologna, northern Italy)
Source: Springer Nature journal article supplement (doi:10.1007/s12520-023-01727-2), 2023-02-28
Supplement: MOESM3 [file 12520_2023_1727_MOESM3_ESM.pdf]

# **On the traces of lost identities: chronological, anthropological and taphonomic analyses of the Late Neolithic/Early Eneolithic fragmented and commingled human remains from the Farneto rock shelter (Bologna, northern Italy)**

## **Archaeological and Anthropological Sciences**

Teresa Nicolosi<sup>1,2</sup>, Valentina Mariotti<sup>1</sup>, Sahra Talamo<sup>3,4</sup>, Monica Miari<sup>5</sup>, Laura Minarini<sup>6</sup>, Gabriele Nenzioni<sup>7</sup>, Fiamma Lenzi<sup>7</sup>, Annalisa Pietrobelli<sup>1</sup>, Rita Sorrentino<sup>1,2</sup>, Stefano Benazzi<sup>2</sup>, Maria Giovanna Belcastro<sup>1</sup>

<sup>1</sup>Department of Biological, Geological and Environmental Sciences, Alma Mater Studiorum University of Bologna, Bologna, Italy

<sup>2</sup>Department of Cultural Heritage, Alma Mater Studiorum University of Bologna, Bologna, Italy

<sup>3</sup>Department of Chemistry ‘Giacomo Ciamician’, Alma Mater Studiorum University of Bologna, Bologna, Italy

<sup>4</sup>Department of Human Evolution, Max Planck Institute for Evolutionary Anthropology, Leipzig, Germany

<sup>5</sup>Soprintendenza Archeologia, Belle Arti e Paesaggio per la città metropolitana di Bologna e le province di Modena, Reggio Emilia e Ferrara, Bologna, Italy

<sup>6</sup>Museo Civico Archeologico, Bologna, Italy

<sup>7</sup>Museo della Preistoria ‘Luigi Donini’, San Lazzaro di Savena, Bologna, Italy

## **Corresponding author**

Maria Giovanna Belcastro [mariagiovanna.belcastro@unibo.it](mailto:mariagiovanna.belcastro@unibo.it)

**S3** Comparison of the element representation index (ERI) from the Farneto rock shelter and other archaeological contexts (data from Knüsel et al. 2016): Scaloria Cave (Foggia, Apulia, southern Italy, Neolithic; corpse manipulation and secondary burials), Kunji Cave (Iran, Bronze Age; collective and secondary burials with probable bone selection) and West Tenter Street (London, UK, Roman period; single primary burials). Abbreviations: H, hand; F, foot

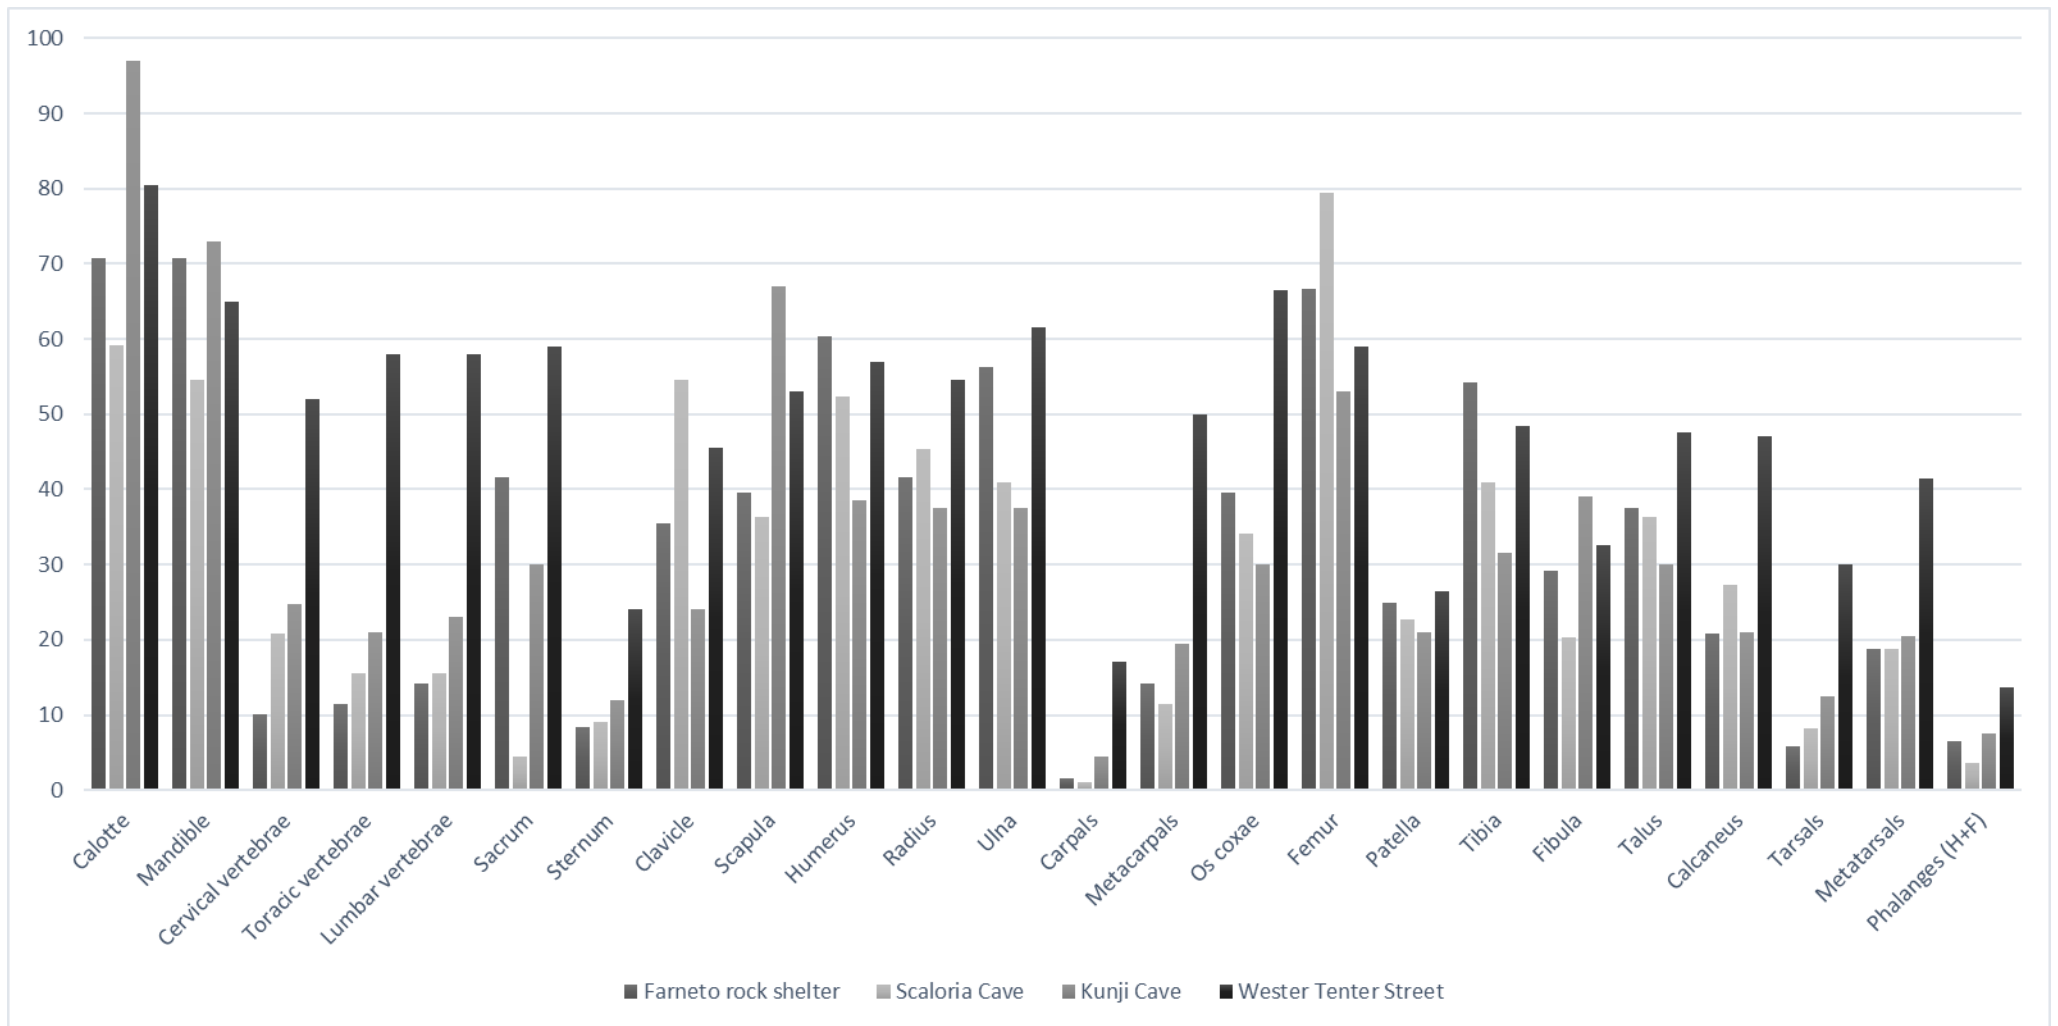

## References

Knüsel C, Robb J, Tafuri MA (2016) The Upper Cave: Taphonomic Analysis of the Treatment of the Dead. In: Elster ES, Isetti E, Traverso A, Robb J (eds) *The Archaeology of Grotta Scaloria. Ritual in Neolithic Southeast Italy*. Monumenta Archaeologica 38:145–191
