# Supplementary material for: On the traces of lost identities: chronological, anthropological and taphonomic analyses of the Late Neolithic/Early Eneolithic fragmented and commingled human remains from the Farneto rock shelter (Bologna, northern Italy)
Source: Springer Nature journal article supplement (doi:10.1007/s12520-023-01727-2), 2023-02-28
Supplement: MOESM4 [file 12520_2023_1727_MOESM4_ESM.pdf]

**On the traces of lost identities: chronological, anthropological and taphonomic analyses of the Late Neolithic/Early Eneolithic fragmented and commingled human remains from the Farneto rock shelter (Bologna, northern Italy)**

**Archaeological and Anthropological Sciences**

Teresa Nicolosi<sup>1,2</sup>, Valentina Mariotti<sup>1</sup>, Sahra Talamo<sup>3,4</sup>, Monica Miari<sup>5</sup>, Laura Minarini<sup>6</sup>, Gabriele Nenzioni<sup>7</sup>, Fiamma Lenzi<sup>7</sup>, Annalisa Pietrobelli<sup>1</sup>, Rita Sorrentino<sup>1,2</sup>, Stefano Benazzi<sup>2</sup>, Maria Giovanna Belcastro<sup>1</sup>

<sup>1</sup>Department of Biological, Geological and Environmental Sciences, Alma Mater Studiorum University of Bologna, Bologna, Italy

<sup>2</sup>Department of Cultural Heritage, Alma Mater Studiorum University of Bologna, Bologna, Italy

<sup>3</sup>Department of Chemistry ‘Giacomo Ciamician’, Alma Mater Studiorum University of Bologna, Bologna, Italy

<sup>4</sup>Department of Human Evolution, Max Planck Institute for Evolutionary Anthropology, Leipzig, Germany

<sup>5</sup>Soprintendenza Archeologia, Belle Arti e Paesaggio per la città metropolitana di Bologna e le province di Modena, Reggio Emilia e Ferrara, Bologna, Italy

<sup>6</sup>Museo Civico Archeologico, Bologna, Italy

<sup>7</sup>Museo della Preistoria ‘Luigi Donini’, San Lazzaro di Savena, Bologna, Italy

**Corresponding author**

Maria Giovanna Belcastro [mariagiovanna.belcastro@unibo.it](mailto:mariagiovanna.belcastro@unibo.it)

**S4** Comparison of the element representation index (ERI) from the Farneto rock shelter and the ‘Tana della Mussina’ (Reggio Emilia; data from Cavazzuti et al. 2020). Abbreviations: H, hand; F, foot

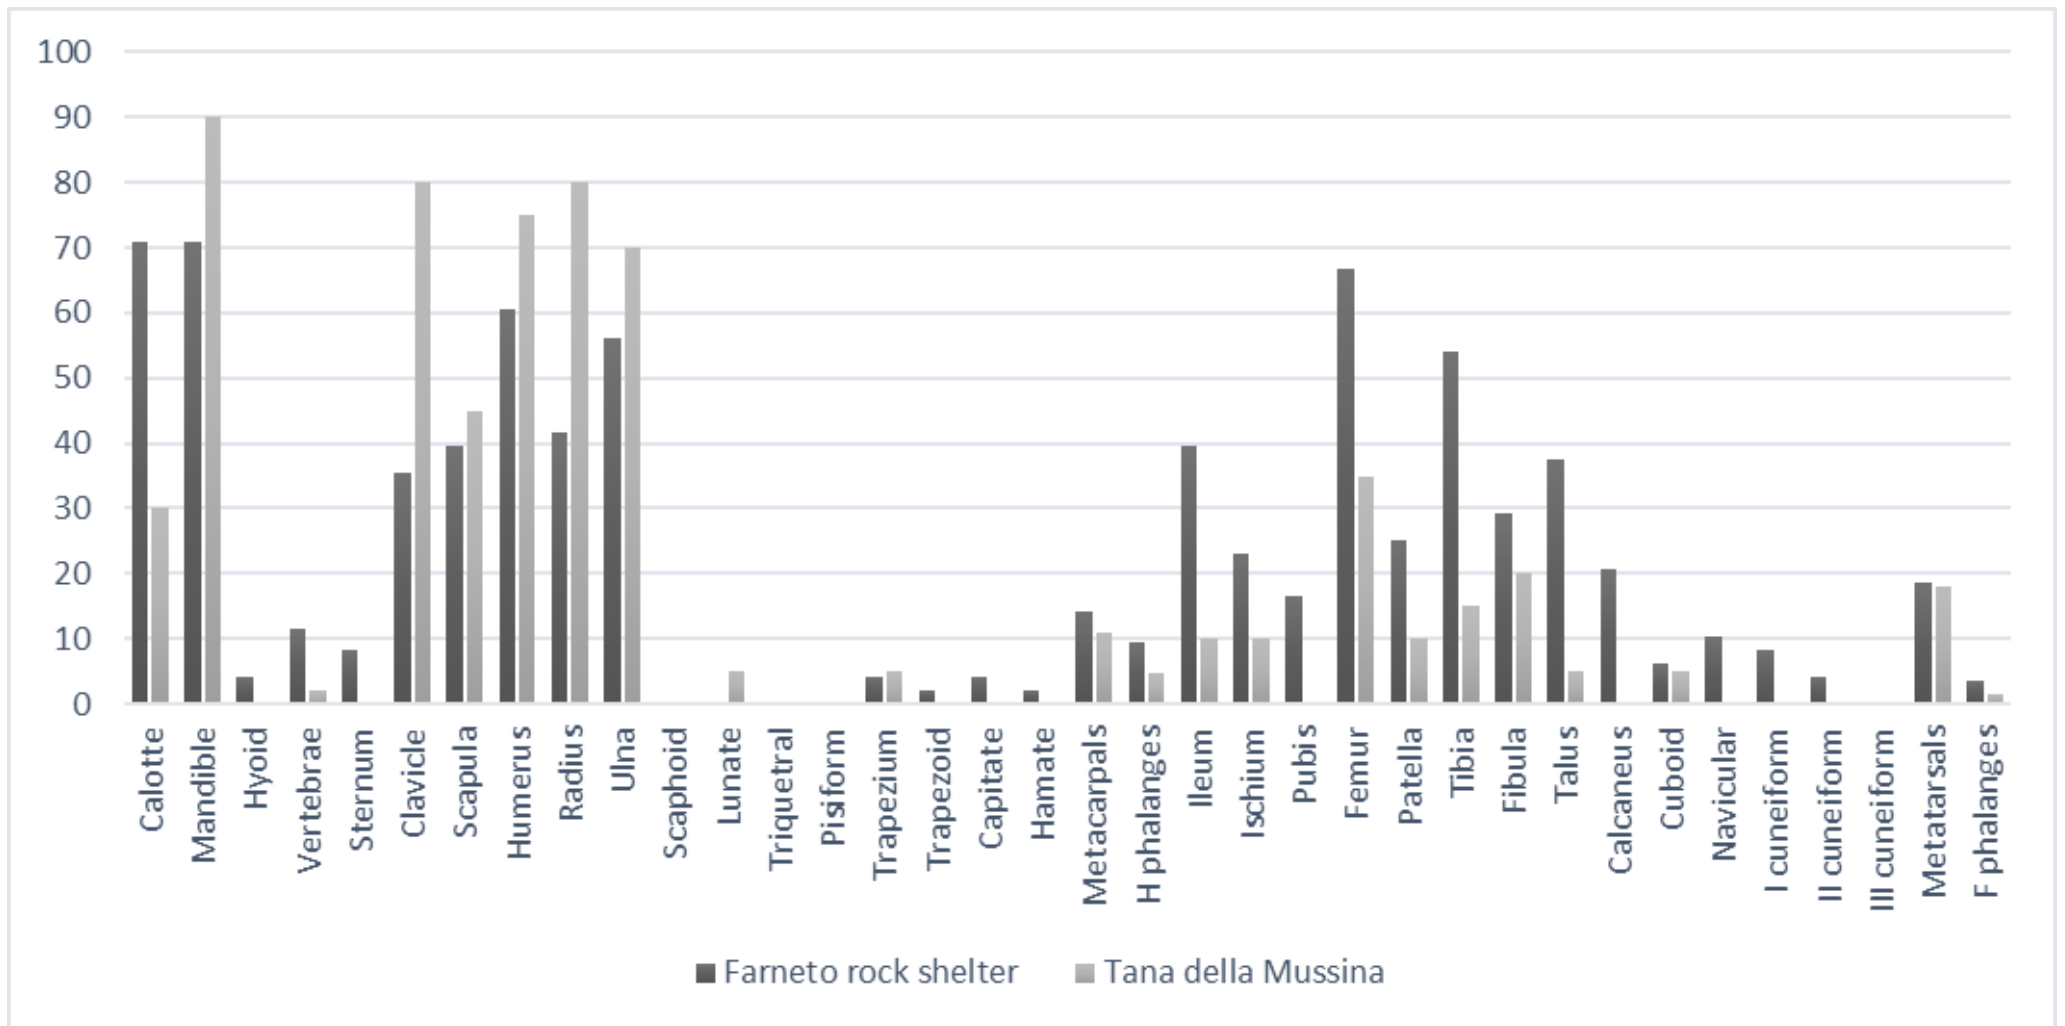

## References

Cavazzuti C, Interlando S, Fiore I (2020) Resti umani alla Tana della Mussina. Fu un ‘rito orribile’?. In: Tirabassi I, Formella W, Cremaschi M (eds) La Tana della Mussina di Borzano. Dallo scavo pionieristico dell’Ottocento agli studi scientifici del Ventunesimo secolo. Federazione Speleologica Regionale dell’Emilia-Romagna, Gruppo Speleologico Paleontologico “G. Chierici” Reggio Emilia 97–106
